# Supplementary material for: Qualitative analysis of 7- and 8-hydroxyzolpidem and discovery of novel zolpidem metabolites in postmortem urine using liquid chromatography–tandem mass spectrometry
Source: Springer Nature journal article supplement (doi:10.1007/s11419-021-00611-9), 2022-01-04

1 **Qualitative analysis of 7- and 8-hydroxyzolpidem and discovery of novel zolpidem metabolites**  
2 **in postmortem urine using liquid chromatography-tandem mass spectrometry**

3  
4 **Koji Yamaguchi<sup>1</sup> · Hajime Miyaguchi<sup>2</sup> · Youkichi Ohno<sup>1</sup> · Yoshimasa Kanawaku<sup>1</sup>**

5  
6 **Supplementary Information: Synthesis of 2-amino-4-methoxy-5-methylpyridine (1) and 2-**  
7 **amino-3-benzyloxy-5-methylpyridine (2)**

8  
9 2-Aminopyridine derivatives **1** and **2** were synthesized following the scheme depicted in Figs. S2  
10 and S3, respectively.

11  
12 *Reagents*

13 2-Bromo-5-methylpyridine, 2-amino-3-bromo-5-methylpyridine, and 3,4,7,8-tetramethyl-1,10-  
14 phenanthroline (Me<sub>4</sub>Phen) were purchased from Tokyo Chemical Industry Co., Ltd. (Tokyo, Japan).  
15 Copper(I) iodide (CuI) and NH<sub>2</sub> silica gel (Wakogel, 50NH2) were purchased from Fujifilm Wako  
16 Pure Chemical Co. (Osaka, Japan). Other chemicals were purchased from Kanto Chemical Co., Inc.  
17 (Tokyo, Japan).

18  
19 *Nuclear magnetic resonance spectroscopy*

20 <sup>1</sup>H and <sup>13</sup>C nuclear magnetic resonance (NMR) spectra were recorded using an Avance III HD  
21 400 (Bruker Co., Billerica, MA) or ECA-600 (JEOL Ltd., Tokyo, Japan) spectrometer. Chemical  
22 shifts were referenced to the tetramethylsilane (TMS) signal at  $\delta = 0$  ppm in chloroform-*d* (CDCl<sub>3</sub>).

23  
24 *High-resolution mass spectrometry*

25 High-resolution mass spectrometry (HR-MS) measurements were performed using a Q  
26 Exactive mass spectrometer (Thermo Fisher Scientific, Waltham, MA) with an electrospray  
27 ionization (ESI) probe. Full scan mass spectra were recorded in positive mode. The conditions for

28 ESI were as follows: sheath gas flow rate, 5 units; capillary temperature, 320 °C; spray voltage, 3.5  
29 kV; probe heater temperature, 350 °C; S-lens RF level, 50 units. Products were dissolved in a 1:1  
30 (v/v) mixture of water–acetonitrile containing 0.1% formic acid at a concentration of 1 µg/mL and  
31 infused into the spectrometer at a flow rate of 10 µL/min.

32

### 33 *1. Synthesis of 2-bromo-5-methylpyridine N-oxide (3)*

34 2-Bromo-5-methylpyridine (3.45 g, 20.0 mmol) was dissolved with chloroform (50 mL),  
35 followed by addition of *m*-chloroperoxybenzoic acid (mCPBA, 6.86 g, 30.6 mmol). The mixture was  
36 stirred at room temperature for 4 days. Saturated aqueous sodium hydrogen sulfite solution (3 mL)  
37 was added and stirred for 15 min. Aqueous sodium carbonate (10% [v/v], 50 mL) was added and the  
38 mixture was transferred to a separation funnel. The organic layer was separated, and the aqueous  
39 phase was extracted with chloroform (50 mL). The organic extracts were combined, dried with  
40 anhydrous sodium sulfate, and evaporated to dryness. The residue was dissolved with ethyl acetate  
41 (10 mL) and passed through a NH<sub>2</sub> silica gel column (3cm [i.d.] × 1 cm [height]). The NH<sub>2</sub> silica gel  
42 was washed with ethyl acetate (60 mL). The eluate was concentrated to approximately 5 mL and  
43 diisopropyl ether (20 mL) was added. White crystals were formed, which were separated and dried  
44 in vacuo. Yield: 3.18 g (16.9 mmol, 84%). <sup>1</sup>H NMR (400 MHz, CDCl<sub>3</sub>) δ 2.30 (s, 3H), 6.96 (d, *J* =  
45 8.23 Hz, 1H), 7.54 (d, *J* = 8.23 Hz, 1H), 8.26 (s, 1H). <sup>13</sup>C NMR (100 MHz, CDCl<sub>3</sub>) δ 18.00, 127.33,  
46 129.73, 130.03, 135.60, 140.35. Elemental analysis calcd for C<sub>6</sub>H<sub>6</sub>BrNO: C 38.33%, H 3.22%, N  
47 7.45%; found: C 38.20%, H 3.36%, N 7.18%. HR-MS: calcd for C<sub>6</sub>H<sub>7</sub>BrNO ([M+H]<sup>+</sup>) 187.9706;  
48 found 187.9707.

49

### 50 *2. Synthesis of 2-bromo-4-nitro-5-methylpyridine N-oxide (4)*

51 Compound **3** (3.76 g, 20.0 mmol) was dissolved in sulfuric acid (5 mL). Nitric acid (5 mL) was  
52 added to this solution. The mixture was carefully heated to 100 °C and stirred for 2 h. The mixture  
53 was cooled to room temperature, and crushed ice (40 g) was added. Saturated aqueous sodium  
54 carbonate was added until the generation of CO<sub>2</sub> ceased. The reaction mixture was extracted three

55 times with chloroform (50 mL). Organic phases were combined, dried with sodium sulfate, and  
56 evaporated to dryness. The residue was dissolved with ethyl acetate (50 mL) and passed through a  
57 NH<sub>2</sub> silica gel column (3 cm [i.d.] × 1 cm [height]). The column was washed with ethyl acetate  
58 (50 mL). The eluate was concentrated under reduced pressure and recrystallization from ethyl  
59 acetate–diisopropyl ether afforded compound **4** as pale-yellow crystals. Yield: 2.74 g (11.8 mmol,  
60 59%). <sup>1</sup>H NMR (400 MHz, CDCl<sub>3</sub>) δ 2.59 (s, 3H), 8.30 (s, 1H), 8.41 (s, 1H). <sup>13</sup>C NMR (100 MHz,  
61 CDCl<sub>3</sub>) δ 17.95, 126.16, 130.70, 131.08, 142.03, 142.30. Elemental analysis calcd for C<sub>6</sub>H<sub>5</sub>BrN<sub>2</sub>O<sub>3</sub>:  
62 C 30.93%, H 2.16%, N 12.02%; found: C 30.87%, H 2.28%, N 11.81%. HR-MS: calcd for  
63 C<sub>6</sub>H<sub>6</sub>BrN<sub>2</sub>O<sub>3</sub> ([M+H]<sup>+</sup>) 232.9556; found 232.9556.

64

### 65 3. Synthesis of 2,4-dibromo-5-methylpyridine N-oxide (**5**)

66 Compound **4** (2.33 g, 10.0 mmol) was dissolved in acetic acid (20 mL) and acetyl bromide  
67 (8.04 g, 65.4 mmol) was added. The mixture was heated at 80 °C for 90 min, and then evaporated to  
68 dryness. An aqueous solution of Na<sub>2</sub>CO<sub>3</sub> (20% [v/w], 50 mL) was added to the residue, and the  
69 solution was extracted with chloroform (30 mL) three times. The extract was dried with sodium  
70 sulfate and evaporated to dryness. The residue was dissolved in ethyl acetate (30 mL) and passed  
71 through a NH<sub>2</sub> silica gel column (3 cm [i.d.] × 1 cm [height]). The column was washed with ethyl  
72 acetate (50 mL). The eluate was concentrated under reduced pressure and recrystallization from  
73 ethyl acetate afforded **5** as white crystals. Yield: 2.15 g (8.05 mmol, 80%). <sup>1</sup>H NMR (400 MHz,  
74 CDCl<sub>3</sub>) δ 2.31 (s, 3H), 7.81 (s, 1H), 8.26 (s, 1H). <sup>13</sup>C NMR (100 MHz, CDCl<sub>3</sub>) δ 19.64, 121.35,  
75 130.45, 132.77, 135.90, 140.16. Elemental analysis calcd for C<sub>6</sub>H<sub>5</sub>Br<sub>2</sub>NO: C 27.00%, H 1.89%, N  
76 5.25%; found: C 26.94%, H 1.97%, N 4.99%. HR-MS: calcd for C<sub>6</sub>H<sub>6</sub>Br<sub>2</sub>NO ([M+H]<sup>+</sup>) 265.8811;  
77 found 265.8812.

78

### 79 4. Synthesis of 2-benzylamino-4-bromo-5-methylpyridine N-oxide (**6**)

80 A mixture of **5** (2.66 g, 9.98 mmol) and benzylamine (3.94 g, 36.9 mmol) was heated at 100 °C  
81 overnight. After cooling to room temperature, 20% (v/w) aqueous solution of Na<sub>2</sub>CO<sub>3</sub> (50 mL) was

82 added and the solution was extracted three times with chloroform (30 mL). The extract was dried  
83 with sodium sulfate and evaporated to dryness. The residue was dissolved in ethyl acetate (100 mL)  
84 and passed through a NH<sub>2</sub> silica gel column (4 cm [i.d.] × 2 cm [height]). The column was washed  
85 with ethyl acetate (60 mL). The eluate was concentrated by evaporation under reduced pressure, and  
86 recrystallization from ethyl acetate–diisopropyl ether afforded **6** as white crystals. Yield: 2.23 g (7.61  
87 mmol, 76%). <sup>1</sup>H NMR (400 MHz, CDCl<sub>3</sub>) δ 2.21 (s, 3H), 4.47 (d, *J* = 5.99 Hz, 2H), 6.74 (s, 1H),  
88 7.06 (brt, *J* = 5.99 Hz, 1H), 7.2–7.4 (m, 5H), 8.01 (s, 1H). <sup>13</sup>C NMR (100 MHz, CDCl<sub>3</sub>) δ 18.88,  
89 46.28, 108.93, 121.85, 124.75, 127.04, 127.85, 128.91, 136.68, 137.11, 148.95. Elemental analysis  
90 calcd for C<sub>13</sub>H<sub>13</sub>BrN<sub>2</sub>O: C 53.26%, H 4.47%, N 9.56%; found: C 53.11%, H 4.34%, N 9.26%. HR-  
91 MS: calcd for C<sub>13</sub>H<sub>14</sub>BrN<sub>2</sub>O ([M+H]<sup>+</sup>) 293.0284; found 293.0282.

92

### 93 *5. Synthesis of 2-benzylamino-4-methoxy-5-methylpyridine (7)*

94 A mixture of **6** (1.17 g, 4.00 mmol), K<sub>2</sub>CO<sub>3</sub> (1.16 g, 8.39 mmol), and methanol (20 mL) was  
95 added to a 50 mL screw vial. The vial was sealed and heated at 100 °C for 3 days. The mixture was  
96 cooled to room temperature, filtrated, and evaporated to dryness. Acetic acid (10 mL), water (10  
97 mL), and ion powder (1.03 g 18.5 mmol) were added to the residue, and the mixture was heated at  
98 100 °C for 90 min. After cooling to room temperature, the mixture was basified with 10% (v/w)  
99 aqueous sodium carbonate. Extraction with ethyl acetate (20 mL) was repeated until all of the target  
100 compound was extracted (confirmed by thin layer chromatography). The extract was dried with  
101 sodium sulfate and concentrated to approximately 20 mL under reduced pressure. The residue was  
102 passed through a silica gel column (3 cm [i.d.] × 2 cm [height]) and the column was washed with  
103 ethyl acetate (30 mL). The eluate was evaporated to dryness. Recrystallization from diisopropyl  
104 ether afforded **7** as white crystals. Yield: 0.544 g (60%). <sup>1</sup>H NMR (400 MHz, CDCl<sub>3</sub>) δ 2.02 (s, 3H),  
105 3.74 (s, 3H), 4.49 (d, *J* = 5.81 Hz, 2H), 4.78 (brt, *J* = 5.81 Hz, 1H), 5.82 (s, 1H), 7.2–7.4 (m, 5H),  
106 7.74 (s, 1H). <sup>13</sup>C NMR (100 MHz, CDCl<sub>3</sub>) δ 12.43, 46.68, 54.76, 88.35, 112.51, 127.17, 127.44,  
107 128.60, 139.48, 148.22, 159.29, 165.43. Elemental analysis calcd for C<sub>14</sub>H<sub>16</sub>N<sub>2</sub>O: C 73.66%, H  
108 7.06%, N 12.27%; found: C 73.40%, H 6.93%, N 12.09%. HR-MS: calcd for C<sub>14</sub>H<sub>17</sub>N<sub>2</sub>O ([M+H]<sup>+</sup>)

109 229.1335; found 229.1333.

110

111 *6. Synthesis of 2-amino-4-methoxy-5-methylpyridine (1)*

112 Compound **7** (115 mg, 0.502 mmol) was added to sulfuric acid (1 mL), and the mixture was  
113 stirred and heated at 40 °C for 90 min. After cooling to room temperature, crushed ice (5 g) was  
114 added to the mixture. Saturated aqueous sodium carbonate was added until the evolution of carbon  
115 dioxide ceased. Water (10 mL) was added and extracted three times with ethyl acetate (20 mL).  
116 Organic phases were combined, dried with sodium sulfate, and evaporated to dryness.  
117 Recrystallization from ethyl acetate–diisopropyl ether afforded **1** as white crystals. Yield: 52.2 mg  
118 (75%). <sup>1</sup>H NMR (400 MHz, CDCl<sub>3</sub>) δ 2.03 (s, 3H), 3.81 (s, 3H), 4.29 (brs, 2H), 5.97 (s, 1H), 7.70 (s,  
119 1H). <sup>13</sup>C NMR (100 MHz, CDCl<sub>3</sub>) δ 12.45, 54.89, 90.14, 113.41, 148.10, 158.81, 165.56. Elemental  
120 analysis calcd for C<sub>7</sub>H<sub>10</sub>N<sub>2</sub>O: C 60.85%, H 7.30%, N 20.28%; found: C 60.71%, H 7.10%, N  
121 20.28%. HR-MS: calcd for C<sub>7</sub>H<sub>11</sub>N<sub>2</sub>O ([M+H]<sup>+</sup>) 139.0866; found 139.0864.

122

123 *Synthesis of 2-amino-3-benzyloxy-5-methylpyridine (2)*

124 2-Amino-3-bromo-5-methylpyridine (2.62 g, 14.02 mmol), cesium carbonate (6.91 g, 21.21  
125 mmol), Me<sub>4</sub>Phen (0.502 g, 2.13 mmol), CuI (0.272 g, 1.43 mmol), and benzyl alcohol (5.25 g, 48.59  
126 mmol) were added to a glass vial and heated at 90 °C for 17 h. The reaction mixture was mixed with  
127 ethyl acetate (20 mL) and passed through a NH<sub>2</sub> silica gel column (9 cm [i.d.] × 1 cm [height]). The  
128 column was washed with ethyl acetate (100 mL). The eluate was extracted four times with 1% (v/v)  
129 hydrochloric acid (50 mL). The aqueous extract was basified with sodium carbonate and extracted  
130 four times with ethyl acetate (50 mL). The extract was evaporated to dryness. The desired product  
131 (**2**) was purified by column chromatography (silica gel, eluent: 1:1 ethyl acetate–hexane) and  
132 recrystallization from diisopropyl ether as white crystals. Yield: 2.08 g (9.71 mmol, 69%). <sup>1</sup>H NMR  
133 (400 MHz, CDCl<sub>3</sub>) δ 2.20 (s, 3H), 4.56 (brs, 2H), 5.05 (s, 2H), 6.84 (s, 1H), 7.3–7.5 (m, 5H), 7.51 (s,  
134 1H). <sup>13</sup>C NMR (100 MHz, CDCl<sub>3</sub>) δ 17.81, 70.12, 118.35, 122.98, 127.57, 128.22, 128.65, 136.39,  
135 138.27, 141.37, 148.12. Elemental analysis calcd for C<sub>13</sub>H<sub>14</sub>N<sub>2</sub>O: C 72.87%, H 6.59%, N 13.07%;

136 found: C 72.78%, H 6.60%, N 13.00%. HR-MS: calcd for C<sub>13</sub>H<sub>15</sub>N<sub>2</sub>O ([M+H]<sup>+</sup>) 215.1179; found  
137 215.1175.  
138  
139

140

141

142

143

144

145

146

147

148

149

150

151

152

153

154

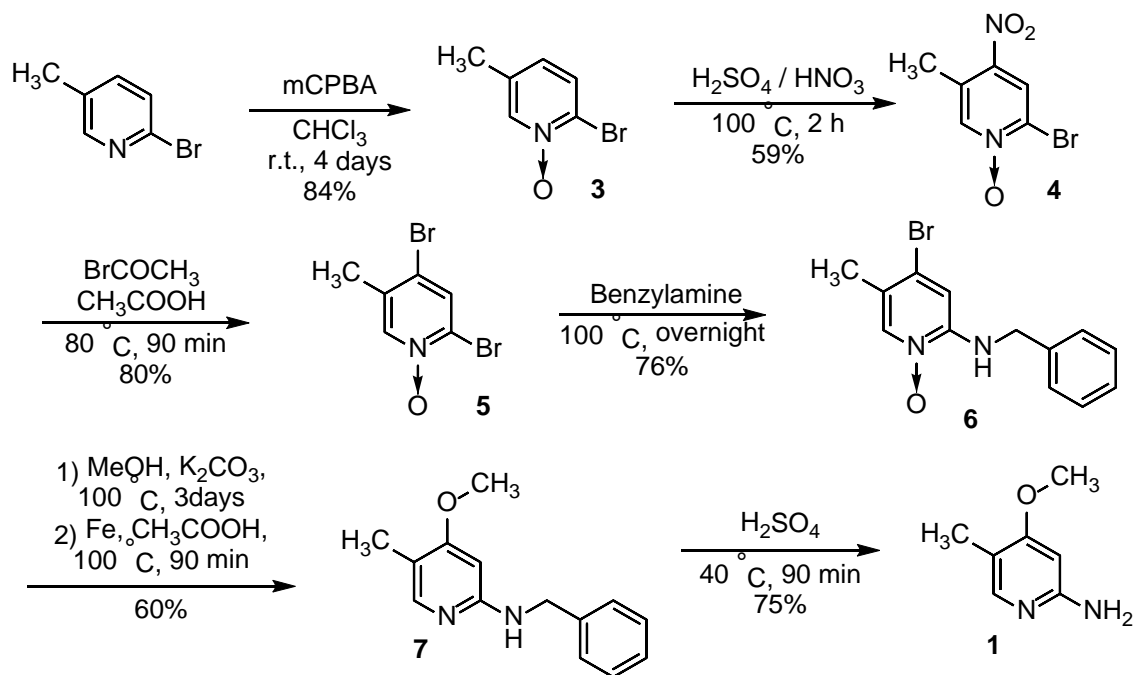

155 **Fig. S2** Synthetic route of 2-amino-4-methoxy-5-methylpyridine (1).

156

157

158

159

160

161

162

163

164 **Fig. S3** Synthesis of 2-amino-3-benzoyloxy-5-methylpyridine (2)

165

166

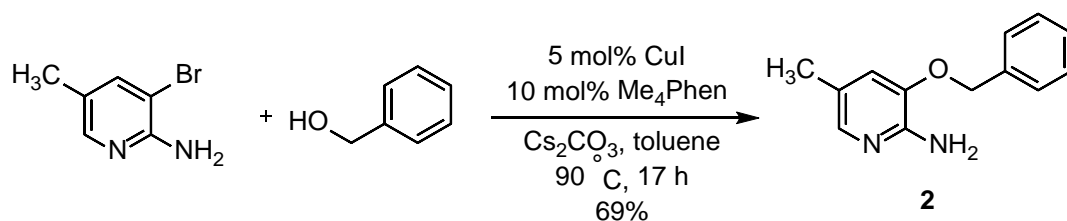

Supplement: MOESM1 [file 19999058]
