# Supplementary material for: Qualitative analysis of 7- and 8-hydroxyzolpidem and discovery of novel zolpidem metabolites in postmortem urine using liquid chromatography–tandem mass spectrometry
Source: Springer Nature journal article supplement (doi:10.1007/s11419-021-00611-9), 2022-01-04
Supplement: MOESM2 [file 19999058]

Qualitative analysis of 7- and 8-hydroxyzolpidem and discovery of novel zolpidem metabolites in postmortem urine using liquid chromatography-tandem mass spectrometry

Koji Yamaguchi<sup>1</sup> · Hajime Miyaguchi<sup>2</sup> · Youkichi Ohno<sup>1</sup> · Yoshimasa Kanawaku<sup>1</sup>

Supplementary Information: Table S1, S2 and Figure S1.

**Table S1.** *m/z* values of ions observed at the LC-QqTOFMS analysis, and their estimated formulas.

| Peak | Scan mode        | Precursor <i>m/z</i> | Observed <i>m/z</i> | Estimated formula                                               | Calculated <i>m/z</i> | Error (mDa) |
|------|------------------|----------------------|---------------------|-----------------------------------------------------------------|-----------------------|-------------|
| A    | Scan             | –                    | 342.1813            | C <sub>19</sub> H <sub>24</sub> N <sub>3</sub> O <sub>3</sub>   | 342.1812              | 0.06        |
|      | Product ion scan | 342.1812             | 324.1705            | C <sub>19</sub> H <sub>22</sub> N <sub>3</sub> O <sub>2</sub>   | 324.1707              | 0.19        |
|      |                  |                      | 279.1134            | C <sub>17</sub> H <sub>15</sub> N <sub>2</sub> O <sub>2</sub>   | 279.1128              | 0.55        |
|      |                  |                      | 251.1180            | C <sub>16</sub> H <sub>15</sub> N <sub>2</sub> O                | 251.1179              | 0.11        |
| B    | Scan             | –                    | 427.1800            | C <sub>22</sub> H <sub>27</sub> N <sub>4</sub> O <sub>3</sub> S | 427.1798              | 0.16        |
|      | Product ion scan | 427.1798             | 340.1479            | C <sub>19</sub> H <sub>22</sub> N <sub>3</sub> OS               | 340.1478              | 0.07        |
|      |                  |                      | 295.0900            | C <sub>17</sub> H <sub>15</sub> N <sub>2</sub> OS               | 295.0900              | 0.05        |
|      |                  |                      | 267.0952            | C <sub>16</sub> H <sub>15</sub> N <sub>2</sub> S                | 267.0951              | 0.15        |
| C    | Scan             | –                    | 445.1906            | C <sub>22</sub> H <sub>29</sub> N <sub>4</sub> O <sub>4</sub> S | 445.1904              | 0.18        |
|      | Product ion scan | 445.1904             | 427.1800            | C <sub>22</sub> H <sub>27</sub> N <sub>4</sub> O <sub>3</sub> S | 427.1798              | 0.15        |
|      |                  |                      | 340.1479            | C <sub>19</sub> H <sub>22</sub> N <sub>3</sub> OS               | 340.1478              | 0.11        |
|      |                  |                      | 324.1707            | C <sub>19</sub> H <sub>22</sub> N <sub>3</sub> O <sub>2</sub>   | 324.1707              | 0.09        |
|      |                  |                      | 308.1758            | C <sub>19</sub> H <sub>22</sub> N <sub>3</sub> O                | 308.1757              | 0.04        |
|      |                  |                      | 279.1140            | C <sub>17</sub> H <sub>15</sub> N <sub>2</sub> O <sub>2</sub>   | 279.1128              | 1.21        |
|      |                  |                      | 251.1181            | C <sub>16</sub> H <sub>15</sub> N <sub>2</sub> O                | 251.1179              | 0.16        |
|      |                  |                      | 235.1232            | C <sub>16</sub> H <sub>15</sub> N <sub>2</sub>                  | 235.1230              | 0.22        |
| D3   | Scan             | –                    | 500.2029            | C <sub>25</sub> H <sub>30</sub> N <sub>3</sub> O <sub>8</sub>   | 500.2027              | 0.16        |
|      | Product ion scan | 500.2027             | 324.1709            | C <sub>19</sub> H <sub>22</sub> N <sub>3</sub> O <sub>2</sub>   | 324.1707              | 0.22        |
|      |                  |                      | 279.1137            | C <sub>17</sub> H <sub>15</sub> N <sub>2</sub> O <sub>2</sub>   | 279.1128              | 0.85        |
|      |                  |                      | 252.1259            | C <sub>16</sub> H <sub>16</sub> N <sub>2</sub> O                | 252.1257              | 0.23        |
|      |                  |                      | 251.1181            | C <sub>16</sub> H <sub>15</sub> N <sub>2</sub> O                | 251.1179              | 0.17        |
| E3   | Scan             | –                    | 518.2135            | C <sub>25</sub> H <sub>32</sub> N <sub>3</sub> O <sub>9</sub>   | 518.2133              | 0.18        |
|      | Product ion scan | 518.2133             | 342.1812            | C <sub>19</sub> H <sub>24</sub> N <sub>3</sub> O <sub>3</sub>   | 342.1812              | 0.02        |
|      |                  |                      | 324.1707            | C <sub>19</sub> H <sub>22</sub> N <sub>3</sub> O <sub>2</sub>   | 324.1707              | 0.00        |
|      |                  |                      | 296.1757            | C <sub>18</sub> H <sub>22</sub> N <sub>3</sub> O                | 296.1757              | –0.03       |
|      |                  |                      | 279.1132            | C <sub>17</sub> H <sub>15</sub> N <sub>2</sub> O <sub>2</sub>   | 279.1128              | 0.36        |
|      |                  |                      | 251.1180            | C <sub>16</sub> H <sub>15</sub> N <sub>2</sub> O                | 251.1179              | 0.12        |

LC-QqTOFMS: liquid chromatography-quadrupole time-of-flight mass spectrometry.

**Table S2.** Changes in peak areas upon glucuronidase treatment.

| Compound              | Peak | Peak area   |             | Change* (%) |
|-----------------------|------|-------------|-------------|-------------|
|                       |      | Glu –       | Glu +       |             |
| ZOL                   |      | 13,117,533  | 12,564,540  | 96          |
| M1                    |      | 218,418,183 | 215,358,442 | 99          |
| M2                    |      | 24,997,092  | 24,535,628  | 98          |
| M3                    |      | 225,956     | 317,248     | 140         |
| M4                    |      | 11,751,676  | 20,744,834  | 177         |
| 7OHZ                  |      | 15,879,802  | 31,442,856  | 198         |
| 8OHZ                  |      | 345,775     | 3,050,829   | 880         |
| ZDHD                  | A    | 9,754,640   | 74,361,618  | 762         |
| Z-Cys                 | B    | 5,775,410   | 5,821,221   | 101         |
| Z-H <sub>2</sub> OCys | C    | 6,946,591   | 6,098,903   | 88          |
| Z-OGlus               | D1   | 837,710     | n.d.        | 0           |
|                       | D2   | 300,609     | n.d.        | 0           |
|                       | D3   | 39,502,000  | 62,245      | 0.16        |
|                       | D4   | 6,109,127   | 8,512       | 0.14        |
|                       | D5   | 9,809,327   | 14,042      | 0.14        |
| ZDHD-Glus             | E1   | 3,697,998   | n.d.        | 0           |
|                       | E2   | 365,611     | 763         | 0.21        |
|                       | E3   | 35,066,186  | 84,082      | 0.24        |

Peak areas in Glu + and Glu – columns represent averages of peak areas ( $n = 3$ ) with and without the glucuronidase treatment.

\*: Values are calculated by dividing the peak areas with glucuronidase treatment by those without the treatment.

n.d.: not detected.

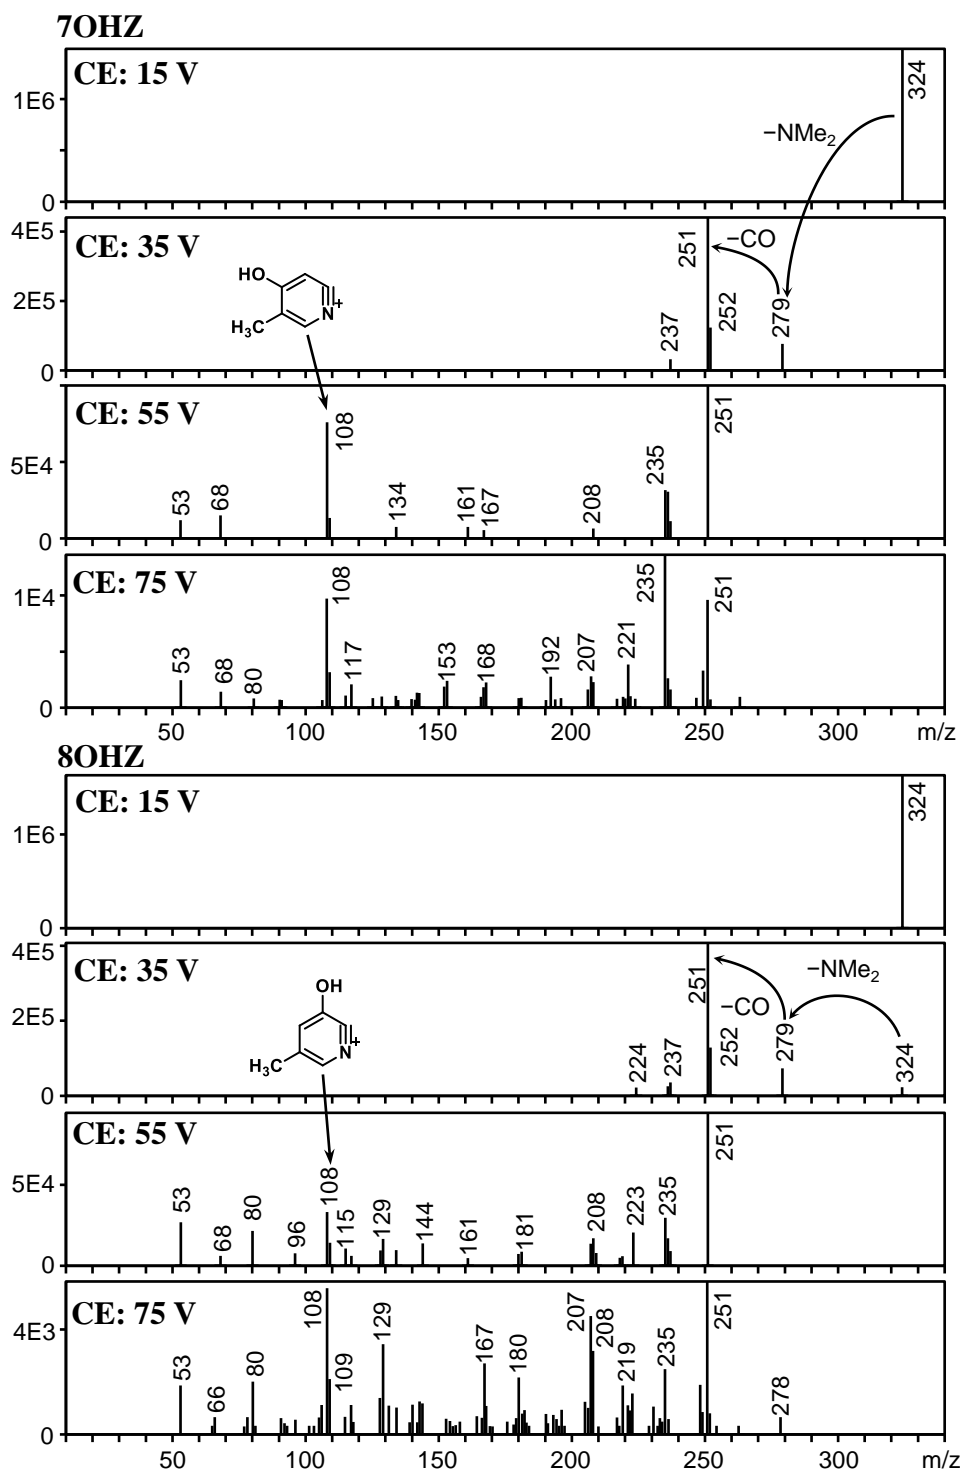

**Fig. S1** Mass spectra of 7OHZ and 8OHZ at various collision energies (CEs)
